# Supplementary material for: Transcriptome sequencing of Tessaratoma papillosa antennae to identify and analyze expression patterns of putative olfaction genes
Source: PubMed Central journal article supplement (PMC5465196; doi:10.1038/s41598-017-03306-7), 2017-06-08
Supplement: 41598_2017_3306_MOESM1_ESM.pdf [file 41598_2017_3306_MOESM1_ESM.pdf]

Supplementary Information for

**Transcriptome sequencing of *Tessaratoma papillosa* antennae to identify and analyze expression patterns of putative olfaction genes**

Zhong-Zhen Wu<sup>1</sup>, Meng-Qiu Qu<sup>1</sup>, Xin-Hua Pu<sup>1</sup>, Yang Cui<sup>1</sup>, Wan-Yu Xiao<sup>1</sup>, Hong-Xia Zhao<sup>2</sup>, Shu-Ying Bin<sup>1</sup>, Jin-Tian Lin<sup>1\*</sup>

<sup>1</sup>Institute for Management of Invasive Alien Species, 314 Yingdong teaching building, Zhongkai University of Agriculture and Engineering, Guangzhou 510225, PR China

<sup>2</sup>Guangdong Institute of Applied Biological Resources, Guangzhou 510260, PR China

\*Corresponding author

Email addresses:

**Zhong-Zhen Wu:** zhongzhen\_wu@163.com

**Meng-Qiu Qu:** qumengqiu@163.com

**Xin-Hua Pu:** pu123xh@163.com

**Yang Cui:** muttcy@163.com

**Wan-Yu Xiao:** yuwanxiao22@126.com

**Hong-Xia Zhao:** Hxzh110@126.com

**Shu-Ying Bin:** binsuying@163.com

**Jin-Tian Lin:** linjtian@163.com

A

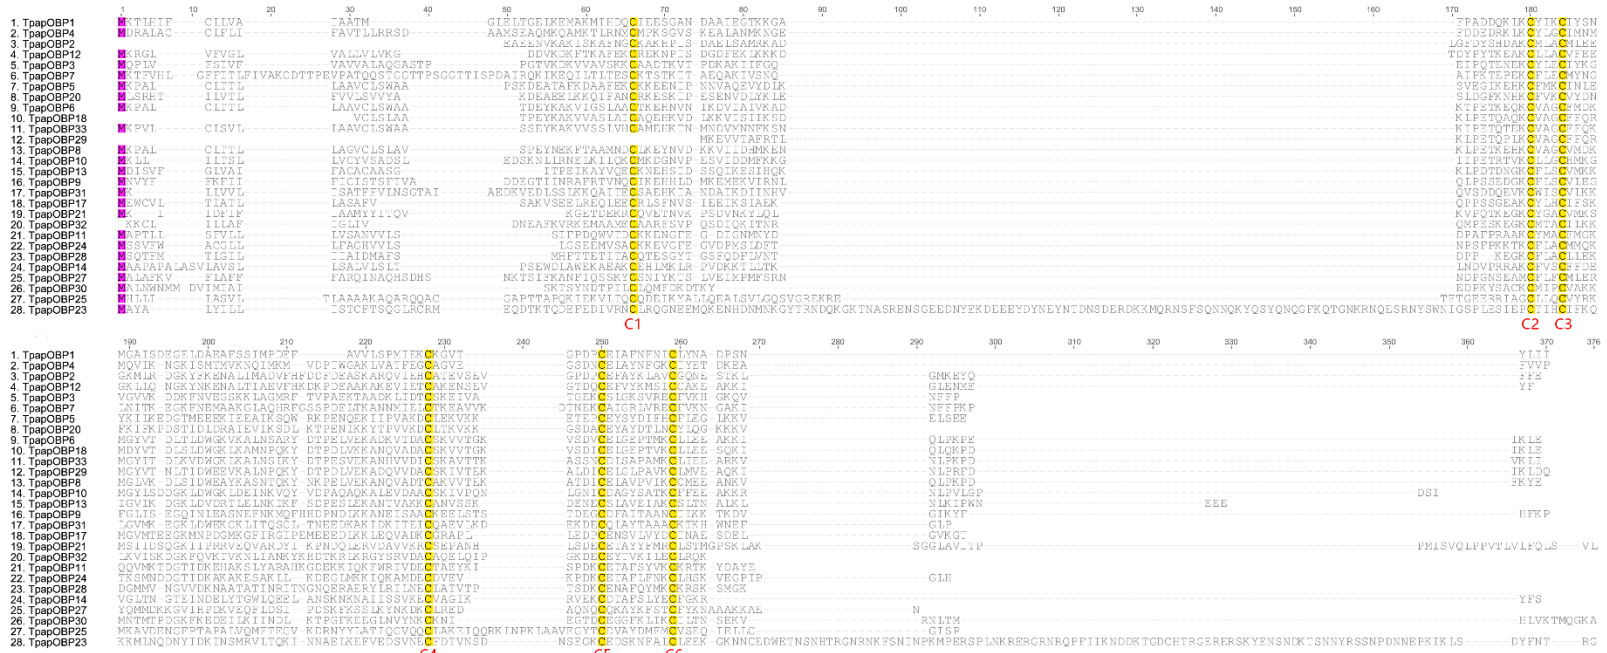

B

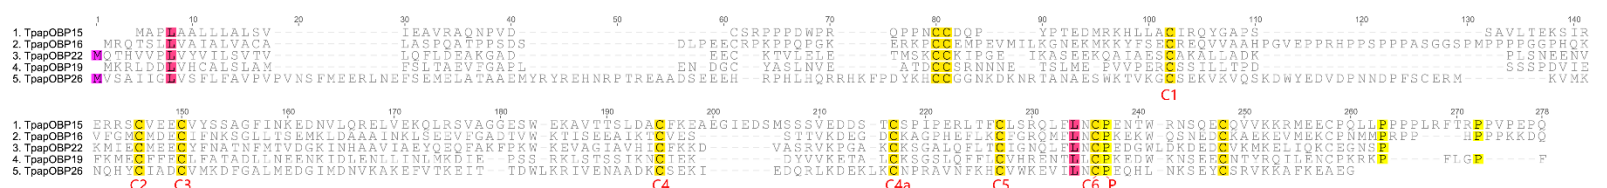

Supplementary Figure S1. Excerpts from the amino acid alignment showing the predicted Classic OBPs (A) and Plus-C OBPs.

**Supplementary Table S1.** An overview of the sequencing and assembly process.

| <b>Item</b>                                                                     | <b>FA</b>     | <b>MA</b>     |
|---------------------------------------------------------------------------------|---------------|---------------|
| Read Length                                                                     | 150           | 150           |
| Total Raw Reads                                                                 | 48,714,852    | 48,710,580    |
| Total Raw Bases                                                                 | 7,307,227,800 | 7,306,587,000 |
| Total Clean Reads                                                               | 48,634,546    | 48,627,008    |
| Total Clean Reads Ratio (%)                                                     | 99.84         | 99.83         |
| Total Clean Bases                                                               | 7,295,181,900 | 7,294,051,200 |
| Total Clean Bases Ratio (%)                                                     | 99.84         | 99.83         |
| Total Adatper Reads                                                             | 60,780        | 65,104        |
| Total Adatper Reads Ratio (%)                                                   | 0.12          | 0.13          |
| Total Low Quality Reads                                                         | 19,526        | 18,468        |
| Total Low Quality Reads Ratio (%)                                               | 0.04          | 0.04          |
| Clean Reads GC (%)                                                              | 42.00         | 39.58         |
| Clean Reads Q20 (%)                                                             | 96.39         | 96.09         |
| Clean Reads Q30 (%)                                                             | 91.25         | 90.61         |
| <b>Combined Trinity assembly of the male and female antennal transcriptomes</b> |               |               |
| Total Number                                                                    | 74,183        |               |
| Min Length                                                                      | 200           |               |
| Max length                                                                      | 24,277        |               |
| Mean Length                                                                     | 1096          |               |
| Unigene N50                                                                     | 2342          |               |
| Unigene N90                                                                     | 374           |               |
| Unigene GC (%)                                                                  | 34.09         |               |

**Supplementary Table S2.** Amino acid sequences of *T. papillosa* and other insects used in phylogenetic analyses.

| Genes      | Insect catalogue | Species                        | Annotation              | Identified Genes                      | Selected Genes | References |
|------------|------------------|--------------------------------|-------------------------|---------------------------------------|----------------|------------|
| OR         | Bug              | <i>Tessaratoma papillosa</i>   | Antennal transcriptome  | 59                                    | 59             | This study |
|            | Bug              | <i>Apolygus lucorum</i>        | Antennal transcriptome  | 110                                   | 92             | [1]        |
|            | Bug              | <i>Halyomorpha halys</i>       | NCBI                    |                                       | 25             | NCBI       |
|            | Planthopper      | <i>Sogatella furcifera</i>     | Antennal transcriptome  | 63                                    | 49             | [2]        |
| iGluRs/IRs | Bug              | <i>Tessaratoma papillosa</i>   | Antennal transcriptome  | 14                                    | 14             | This study |
|            | Fly              | <i>Drosophila melanogaster</i> | Genomes                 | 80                                    | 80             |            |
|            | Moth             | <i>Bombyx mori</i>             | Genomes                 | 31                                    | 18*            | [3]        |
|            | Aphid            | <i>Acyrtosiphon pisum</i>      | Genomes                 | 22                                    | 22             |            |
| OBP        | Bug              | <i>Tessaratoma papillosa</i>   | Antennal transcriptome  | 33                                    | 33             | This study |
|            | Bug              | <i>Halyomorpha halys</i>       | Antennal transcriptome  | 30                                    | 30             | [4]        |
|            | Bug              | <i>Lygus lineolaris</i>        | Antennal transcriptome  | 33                                    | 33             | [5]        |
|            | Bug              | <i>Apolygus lucorum</i>        | Antennal transcriptome  | 38                                    | 38             | [6]        |
|            | Bug              | <i>Adelphocoris lineolatus</i> | Antennal transcriptome  | 14                                    | 14             | [7]        |
|            | Bug              | <i>Adelphocoris suturalis</i>  | Antennal transcriptome  | 16                                    | 16             | [8]        |
|            | Aphid            | <i>Sitobion avenae</i>         | Antennal transcriptome  | 13                                    | 13             | [9]        |
|            | Aphid            | <i>Acyrtosiphon pisum</i>      | Genomes                 | 18                                    | 17             | [10, 11]   |
|            | Aphid            | <i>Aphis gossypii</i>          | Antennal transcriptome  | 9                                     | 9              | [12]       |
|            | Planthopper      | <i>Nilaparvata lugens</i>      | Antennal transcriptome  | 10                                    | 10             | [13]       |
|            | Planthopper      | <i>Sogatella furcifera</i>     | Transcriptomes          | 12                                    | 9              | [14]       |
|            |                  | Psyllid                        | <i>Diaphorina citri</i> | Antennal and Abdominal Transcriptomes | 9              | 9          |

\*antennal IRs

**References**

1. An, X.K., *et al.* Identification and expression analysis of an olfactory receptor gene family in green plant bug *Apolygus lucorum* (Meyer-Dür). *Sci. Rep.* 6, 37870 (2016).
2. He, M., Zhang, Y.N. & He, P. Molecular Characterization and Differential Expression of an Olfactory Receptor Gene Family in the White-Backed Planthopper *Sogatella furcifera* Based on Transcriptome Analysis. *PLoS One* 10, e140605 (2015).
3. Croset, V. *et al.* Ancient protostome origin of chemosensory ionotropic glutamate receptors and the evolution of insect taste and olfaction. *PLoS Genet.* 6, e1001064 (2010).
4. Paula, D.P. *et al.* Identification and expression profile of odorant-binding proteins in *Halyomorpha halys* (Hemiptera: Pentatomidae). *Insect Mol. Biol.* 25, 580–594 (2016).
5. Hull, J.J., Perera, O.P. & Snodgrass, G.L. Cloning and expression profiling of odorant-binding proteins in the

- tarnished plant bug, *Lygus lineolaris*. *Insect Mol. Biol.* 23, 78-97 (2014).
6. Yuan, H.B., *et al.* Molecular Characterization and Expression Profiling of Odorant-Binding Proteins in *Apolygus lucorum*. *PLoS One* 10, e140562 (2015).
  7. Gu, S.H., *et al.* Identification and tissue distribution of odorant binding protein genes in the lucerne plant bug *Adelphocoris lineolatus* (Goeze). *Insect Biochem. Mol. Biol.* 41, 254-263 (2011).
  8. Cui, H.H., *et al.* Odorant-binding and chemosensory proteins identified in the antennal transcriptome of *Adelphocoris suturalis* Jakovlev. *Comp. Biochem. Physiol. Part D Genomics Proteomics* (2016).
  9. Xue, W., *et al.* Identification and Expression Analysis of Candidate Odorant-Binding Protein and Chemosensory Protein Genes by Antennal Transcriptome of *Sitobion avenae*. *PLoS One* 11, e161839 (2016).
  10. Zhou, J.J., *et al.* Genome annotation and comparative analyses of the odorant-binding proteins and chemosensory proteins in the pea aphid *Acyrtosiphon pisum*. *Insect Mol. Biol.* 19 (Suppl. 2), 113-122 (2010).
  11. Vieira, F.G. & Rozas, J. Comparative Genomics of the Odorant-Binding and Chemosensory Protein Gene Families across the Arthropoda: Origin and Evolutionary History of the Chemosensory System. *Genome Biol. Evol.* 3, 476-490 (2011).
  12. Gu, S., *et al.* Identification and Expression Profiling of Odorant Binding Proteins and Chemosensory Proteins between Two Wingless Morphs and a Winged Morph of the Cotton Aphid *Aphis gossypii* Glover. *PLoS One* 8, e73524 (2013).
  13. Zhou, S.S., Sun, Z., Ma, W., Chen, W. & Wang, M.Q. De novo analysis of the *Nilaparvata lugens* (Stal) antenna transcriptome and expression patterns of olfactory genes. *Comp. Biochem. Physiol. Part D Genomics Proteomics* 9 (Part D 9), 31-39 (2014).
  14. He, M. & He, P. Molecular characterization, expression profiling, and binding properties of odorant binding protein genes in the whitebacked planthopper, *Sogatella furcifera*. *Comp. Biochem. Physiol. B Biochem. Mol. Biol.* 174, 1-8 (2014).
  15. Wu, Z., Zhang, H., Bin, S., Chen, L., Han, Q. & Lin, J. Antennal and Abdominal Transcriptomes Reveal Chemosensory Genes in the Asian Citrus Psyllid, *Diaphorina citri*. *PLoS One* 11, e159372 (2016).

**Supplementary Table S3.** List of primers used in qPCR.

| Gene Name       | Forward Primer (5'-3') | Reverse Primer (5'-3') | TM (°C) | Product size (bp) |
|-----------------|------------------------|------------------------|---------|-------------------|
| Reference genes |                        |                        |         |                   |
| TpapUBE4A       | GGAGCGGTTGGTTGTGTTAG   | TCTCCTTGCTCTGTAGGCTG   | 59      | 224               |
| TpapRPL32       | AACAGGGTCCGCAAAGTTC    | CCTGAGACGAGCATTGGGAT   | 59      | 178               |
| OBPs            |                        |                        |         |                   |
| TpapOBP1        | GAATCAGGAGCGAACGATGC   | TTGAAAGCCAACCTCACAGGG  | 59      | 245               |
| TpapOBP2        | TGCCGAAC TAAGTGCAATGAG | GCAAATTCGCATGGATCTGG   | 59      | 249               |
| TpapOBP3        | CCACTCGTCTTCTCCATCGT   | TTCATCTCGGTCTGTGGGA    | 59      | 183               |
| TpapOBP4        | GCTTGTCTCTCATCTTCGCA   | CTTCGTCGTCAAATTCCTCA   | 59      | 168               |
| TpapOBP5        | ACCTGCTCTGTGTCTTACCA   | CCATTGTCCCGTCTTCTTTCA  | 59      | 245               |
| TpapOBP6        | CGAGATATGACACCCCGGAG   | GCTTGATCTCTGGTTTCGGC   | 59      | 168               |
| TpapOBP7        | TACCACACCTGAAGTCCAG    | CTTTGCCTGTTCTGTGTGA    | 59      | 166               |
| TpapOBP8        | TGGCGGTATCCCCAGAATAT   | TTCTCGACCAACTCAGGCTT   | 59      | 250               |
| TpapOBP9        | GTTGCGGATGATGAAGGGAC   | ACCAAATCCCTCCAAGACACA  | 59      | 171               |
| TpapOBP10       | GCTTTTGATCCTGACTTCGCT  | ATCATCGCTCAGGTATCCCA   | 59      | 232               |
| TpapOBP11       | TGTTCTCCTGCTCGTCTCAG   | CACTTGCTGCTTTCCCATGA   | 59      | 181               |
| TpapOBP12       | GAGAGGCTGGTCTTCGTAG    | AGACACAAGCTAGGAGACACT  | 59      | 197               |
| TpapOBP13       | ATCTGTCTTCGGGCTTGTGG   | GTCCACGTCCAATTTGCCAT   | 59      | 232               |
| TpapOBP14       | GGCCTGTTGACAAGAAGACG   | GCCACACATTCTTTCACCGA   | 59      | 205               |
| TpapOBP15       | ACGGAAGACATGAGGAAGCA   | ACAGCTTCTCCAGGACTC     | 59      | 224               |
| TpapOBP16       | GTTACCAATGCCACCACC     | TTGACTGTGGTGCTGCTTTC   | 59      | 223               |
| TpapOBP17       | AACCATCGCTACTCTCCTGG   | TTCCCTTCCTCGGTCATCAC   | 59      | 210               |
| TpapOBP18       | TTTGCCTCAGGAACACAAA    | CATCGCCTTCAGTTTTCCTCC  | 59      | 164               |
| TpapOBP19       | CCGCGACTTGTGAATGAA     | GCAGTGTGTTTTCTCGGTGA   | 59      | 207               |
| TpapOBP20       | TCAAACCAGATTCCACCATTGA | AAGCATATTCACAAGCGTCAGA | 59      | 150               |
| TpapOBP21       | AGAAGGGAAGTGCTATGGGG   | CACATTCATCGCTCAGGTGG   | 59      | 188               |
| TpapOBP22       | AAGTTGCAGGAATCGCAGTG   | ATCTAGCCACCCATCTTCCG   | 59      | 152               |
| TpapOBP23       | GCCTACGCGCTCTACATACT   | ACCACTATTTTCTCGTGAGGC  | 59      | 228               |
| TpapOBP24       | GACGGAACCATAGACAAGGC   | AGTGTAACCTGGGATGGGG    | 59      | 190               |
| TpapOBP25       | TACGCTCTCCTCCAAGAAGC   | CCAAACACTGCTGAACTCCC   | 59      | 244               |
| TpapOBP26       | TCGGAGAAGGTGAAAGTCCA   | ATGCCATCTTCCATCAACGC   | 59      | 158               |
| TpapOBP27       | GCCCAACATTCTGATCACTCA  | ACACATTGCTTCTGAGTTACCA | 59      | 156               |
| TpapOBP28       | AAGTGTTTCTGGCTTGTCT    | CACTTGCCCATGACTTTGA    | 59      | 233               |
| TpapOBP29       | AACTCCAGAAACTCAGCCA    | AGGCATTTTACAGCAGGCAA   | 59      | 232               |
| TpapOBP30       | ATGATTCCATGCGTTGCTAAAA | ACCTTCACAATCAGTCCCCT   | 59      | 168               |
| TpapOBP31       | AAGCAGGCTATCACTGAATGT  | ACCTTCCTTCATCACACCCA   | 59      | 150               |
| TpapOBP32       | CAAACCGACAGATGCCAGAA   | TCACATTCATCTTCCAGGAA   | 59      | 220               |
| TpapOBP33       | TACTGTGCCTGTCCGTTCTT   | GGCAACACACTTCTCGGTTT   | 59      | 185               |
| ORs             |                        |                        |         |                   |
| TpapOR1         | GATACCTACGATGCGGACCA   | TCATTCGGGACAGAGCAGTT   | 59      | 199               |
| TpapOR2         | CTCTCCGAATTGAACGCAG    | GCCCTGAAAGAACTGAGGC    | 59      | 223               |
| TpapOR3         | TATGAAGGTCCGGGAAGCAC   | TGTTTTCTTTGTCTGCCTCA   | 59      | 213               |
| TpapOR4         | GGTTCCATCGCCAAACTGTT   | ATGTGCATGTTGTGGGTGAC   | 59      | 173               |
| TpapOR5         | AATGATTGGTGTGCGATGGG   | GATGCCCAAAAAGAACTGCA   | 59      | 221               |
| TpapOR6         | CGCTTCATCAACCACTACCG   | GGTGAGCAGTATCCCACT     | 59      | 249               |
| TpapOR7         | TACTGGGACGACAATGAGGG   | AGGCTTCTTGACCCTCCAAA   | 59      | 216               |
| TpapOR8         | CGACTATAAGCGAGAAGGGGT  | CCTCCAGTCACCTCGTCAAT   | 59      | 180               |
| TpapOR9         | ATTGACTACATCGCCACCA    | CCTCCAAGGTAGACACACAGT  | 59      | 250               |
| TpapOR10        | AGTCAACCACGTTACAGGA    | TATAACACTGTCGCGCTCT    | 59      | 247               |
| TpapOR11        | CCGTCCAGCTTATCAACACG   | GCCTGAAGATGTCGCTCAAG   | 59      | 156               |
| TpapOR12        | TGCCAGTTGTCATTGATTGTCT | GAAACCTTCTGTTCACACA    | 59      | 189               |
| TpapOR13        | AGTGTCTTCATCGTTGGGA    | CCACCTCCTATTGTCGTCA    | 59      | 172               |
| TpapOR14        | CAACGGTTTAAAGGAGGCC    | GCAGTAGACACAGACCCAGT   | 59      | 205               |
| TpapOR15        | ATGAGGCAGAACACAAAGCG   | TGGACTCCAGCAACGGTATA   | 59      | 162               |
| TpapOR16        | TGGGCAAATCTCGCTACCT    | TGCGGGGAAATGATGAGGTA   | 59      | 166               |
| TpapOR17        | ATCCTGTGCCTATGTCCGAG   | ACCGAGCCTAACTTCATGGT   | 59      | 184               |
| TpapOR18        | ACTCCAAGTACATCGGGTCC   | GAGTGTGCCGACTACTACCA   | 59      | 203               |
| TpapOR19        | CGCTTCTTCGTTCTCATGG    | AGGCCGTCATATCCCTTCAG   | 59      | 150               |
| TpapOR20        | TCATCCGTTCAAGTATCTCGCA | GGTCTCACCTTCTAGCTC     | 59      | 186               |

**Continued**

|             |                       |                         |    |     |
|-------------|-----------------------|-------------------------|----|-----|
| TpapOR21    | CGAAACTGACCCGTTGAAGA  | GAGCAGCCTCGAAACTCTTT    | 59 | 161 |
| TpapOR22    | ATTCCAGATCACAAGCGAGC  | CAGTCACCGCCAACATACTG    | 59 | 181 |
| TpapOR23    | GGATCTGTGTCTCCGGAA    | CACCACCCAGTTCACCTTGG    | 59 | 152 |
| TpapOR24    | CCCTTTCAACAACGCTGACA  | CCGGTGACATCTCCCTCTTT    | 59 | 192 |
| TpapOR25    | TTCTCTGGAGCTTTGGTGGT  | GAAGACGTATGCCCTCGTA     | 59 | 204 |
| TpapOR26    | TGGCCCTGGACTATTGGTTT  | TCAGCTTCCAGTGTGACCTT    | 59 | 175 |
| TpapOR27    | GCCTGACATTTGCAAGACCA  | CTCAGCATAACCCCTCCGAT    | 59 | 210 |
| TpapOR28    | CGCCAGGTTGCCATACTTTT  | AATTGCTTGAGTCGATGGC     | 59 | 202 |
| TpapOR29    | ACATCTGTGCCCTGTTTCAT  | AAAAGAATCAGCCAAGCCCG    | 59 | 170 |
| TpapOR30    | TCACCCTCCAACCTAACAGCT | CCAACCAACAAAGTACGGCA    | 59 | 250 |
| TpapOR31    | CGTCTTGAGGTTCTGGGGA   | CTGTTTGTGCATCTGGAGCA    | 59 | 151 |
| TpapOR32    | GGCAAACCTGTTCTCCGTTT  | CACCTCCTCATTCATTGCG     | 59 | 177 |
| TpapOR33    | GTCTCGATGTTCTGCGTTGT  | GGTCTCACCTTCTAGCTC      | 59 | 150 |
| TpapOR34    | ATTGTGGAGGGAGATGGGTG  | AGTGGAGCAAGCGAAGTAGT    | 59 | 235 |
| TpapOR35    | GCCACATCCTCTTTACCGTC  | ACAGCAGACCAGAAACCAGT    | 59 | 249 |
| TpapOR36    | CAGCGCATTGTTCTTAGGAC  | CGCACATGTAGTTGGAGGTG    | 59 | 218 |
| TpapOR37    | CCTTCGAGGGCGACAGTATT  | CCTCGGTTCCAAGTCTCTCA    | 59 | 176 |
| TpapOR38    | CTTATCACGGCCAGTTTGCA  | TACTTCTGTGCGCCAGGTT     | 59 | 194 |
| TpapOR39    | TCTGGCCGTGTATGTCTGTT  | GTTCCGCCGCATAACTCAAG    | 59 | 212 |
| TpapOR40    | GTAGTGGACCCGGGATATC   | CCGAGCACAGCGAATTGTAA    | 59 | 248 |
| TpapOR41    | GGCTTTCCACTTCGTCCTTC  | GCAATCTCCGATGTAGGCG     | 59 | 171 |
| TpapOR42    | TGTCGTATGAGGCCACAGAA  | GTGAGGGTTTGC GGTTTCAA   | 59 | 175 |
| TpapOR43    | CAGGGGTATCATGGGTAGGC  | AGGCAGTTGAAAAGGAGGGA    | 59 | 153 |
| TpapOR44    | AATCGGGAATCAGCTAACGC  | AATCCTGCGAACGTACATGC    | 59 | 176 |
| TpapOR45    | GACAGCAGCGAGTCTTGAG   | ATGCGATGATGATGCGGTTT    | 59 | 226 |
| TpapOR46    | GTTCTACCGACCACTTTGCC  | AGTGGATTTCGACTGTCAGA    | 59 | 218 |
| TpapOR47    | TCCTCCATTTCTAGCTTCCA  | TCCGTCTTCCATCATTCTCT    | 59 | 163 |
| TpapOR48    | CTCGTGCAATGTTTGTCTCT  | TGGATGTCTGCAAAAACCAACA  | 59 | 175 |
| TpapOR49    | AGTTCGGCTGCGTCTTCTAT  | GCGATGAACACAGTGAGGAG    | 59 | 175 |
| TpapOR50    | GGTACTTGTCCGAATCGCAG  | AGTTGGTTGCCGATGGTTTC    | 59 | 196 |
| TpapOR51    | CAAAACCTGTTTCAGCACGA  | ATACTCGGACCTGATGCCTG    | 59 | 187 |
| TpapOR52    | ATTGACTACATCGCCACCA   | ACACAGTACCCAAGCACAGT    | 59 | 236 |
| TpapOR53    | TCGATGCCCTCAAGAACAGT  | CGACGACATGCAAGCAGAAT    | 59 | 204 |
| TpapOR54    | ATCTGAAATGGTTGTCGGCG  | CCCTTGAATTGCATCGTCGT    | 59 | 245 |
| TpapOR55    | GACTTGCCATGTGAGGGTTT  | TGTTTGATGATTGCTAGCTCTGT | 59 | 176 |
| TpapOR56    | AGCGAGGGAGATAGTGATGC  | GGATTACAGGTTTCCCAAA     | 59 | 212 |
| TpapOR57    | CGTCTATGTGTGGGAGGTGA  | ATCACGCCGCTTCTGATTTT    | 59 | 237 |
| TpapOR58    | TATGCCCACTTTGTGCTCCT  | CTGTATCCAGCGCCAATGTC    | 59 | 214 |
| TpapOR 59   | ACTTGGCCTCCTTTCATCGA  | TCAGAGCGTCTTTGTTCT      | 59 | 203 |
| Antenal IRs |                       |                         |    |     |
| TpapIR8a    | AGACATTGGTATCACGCCCT  | GGACAGTCACCCGAAGAGAT    | 59 | 155 |
| TpapIR25a   | TATCATGCCACTGTCACGGT  | AGCGTCCACTTTAACTCCCA    | 59 | 150 |
| TpapIR76b   | TTTGGGAAAGTTGGCCTCAG  | CCAAAAGACCACTGCCAGTC    | 59 | 164 |
| TpapIR92a   | TGACGTGTGGATAGCGTTCT  | GCTCTCATGCTGCTGCTTTC    | 59 | 150 |
| TpapIR93a   | TACAGCAGGGAGGAGGAGTA  | GAAGGGTGGAAATGTTCTGGC   | 59 | 216 |
| TpapIR75d.1 | CTGACCTCACGAACAGTCTCT | AAGCAAACAACCCAGATCGG    | 59 | 186 |
| TpapIR75d.2 | CTCCTCACCTCCTAATCGG   | ACGGAGGTTACAGTCTCAGC    | 59 | 176 |
| TpapIR84a   | TTTACCTTCACCGCCTCTA   | AGTCCAGGTTCCGTTATGCA    | 59 | 217 |
